# Supplementary material for: Auto-correlation of journal impact factor for consensus research reporting statements: a cohort study
Source: PeerJ. 2016 Mar 31;4:e1887. doi: 10.7717/peerj.1887 (PMC4824875; doi:10.7717/peerj.1887)
Supplement: Supplemental Information 1 [file peerj-04-1887-s001.xlsx]

## Sheet: STARD
Sample	IF	IF rank	Citations	Cit rank	d	d2	lg(IF)	lg(Citations)
1	11.275	2	781	1	1	1	1.05212	2.89265			∑d2	192
2	15.148	1	510	3	-2	4	1.18036	2.70757			n	15
3	6.382	3	543	2	1	1	0.804957	2.7348			n3	3375
4	5.6435	4	227	4	0	0	0.751549	2.35603			n3-n	3360
5	2.7765	5	35	10	-5	25	0.443498	1.54407
6	1.887	8	39	8.5	-0.5	0.25	0.275772	1.59106
7	2.0575	7	25	13	-6	36	0.31334	1.39794			Spearman's	0.657143
8	1.5365	12	105	5	7	49	0.186533	2.02119			df	13
9	1.654	11	71	6	5	25	0.218536	1.85126			ρ	0
10	1.144	13	41	7	6	36	0.058426	1.61278			ST	0.209057
11	2.609	6	39	8.5	-2.5	6.25	0.416474	1.59106			T	3.14337
12	1.8525	9	27	11	-2	4	0.267758	1.43136			p	0.00777025
13	1.8475	10	26	12	-2	4	0.266584	1.41497
14	0	14.5	3	15	-0.5	0.25					ST	0.141476
15	0	14.5	8	14	0.5	0.25					T	6.07956
											Pearson's	0.860115
Mean	3.72087		165.333								p	3.90736e-05
SD	4.13968		235.305
Median	1.887		39
Accesses:
Sample	Accesses	Acc rank	Citations	Cit rank	d	d2	lg(Accesses)	lg(Citations)
1	12203	1	781	1	0	0	4.08647	2.89265			∑d2	0
2	615	3	25	3	0	0	2.78888	1.39794			n	3
3	1257	2	71	2	0	0	3.09934	1.85126			n3	27
											n3-n	24
											Spearman's	1
											df	1
											ρ	0
											ST	0
											T	#DIV/0!
											p	#DIV/0!
Mean	4691.67		292.333								ST	0.0690299
SD	5317.78		346.049								T	14.4519
Median	1257		71								Pearson's	0.997615
											p	0.0439808
Lg Citations vs lg IF
Regression Statistics
Multiple R	0.860115
R Square	0.739797
Adjusted R Square	0.716143
Standard Error	0.29388
Observations	13
ANOVA
	df	SS	MS	F	Significance F
Regression	1	2.70106	2.70106	31.2747	0.000162145
Residual	11	0.950022	0.0863656
Total	12	3.65108
	Coefficients	Standard Error	t Stat	P-value	Lower 95%	Upper 95%	Lower 95.0%	Upper 95.0%
Intercept	1.28956	0.141201	9.13275	1.81596e-06	0.978775	1.60034	0.978775	1.60034
lg(IF)	1.34423	0.240369	5.59238	0.000162145	0.815186	1.87328	0.815186	1.87328
Lg citations vs lg Downloads
Regression Statistics
Multiple R	0.997615
R Square	0.995235
Adjusted R Square	0.99047
Standard Error	0.0748176
Observations	3
ANOVA
	df	SS	MS	F	Significance F
Regression	1	1.16912	1.16912	208.858	0.0439808
Residual	1	0.00559768	0.00559768
Total	2	1.17472
	Coefficients	Standard Error	t Stat	P-value	Lower 95%	Upper 95%	Lower 95.0%	Upper 95.0%
Intercept	-1.70454	0.263176	-6.4768	0.0975223	-5.04851	1.63943	-5.04851	1.63943
lg(Accesses)	1.1284	0.0780798	14.4519	0.0439808	0.136306	2.1205	0.136306	2.1205

## Sheet: STROBE
Citations
Sample	IF	IF rank	Citations	Cit rank	d	d2	lg(IF)	lg(Citations)
1	33.5455	1	966	1	0	0	1.52563	2.98498			∑d2	9
2	13.5655	4	452	2	2	4	1.13244	2.65514			n	9
3	16.1645	2	404	3	-1	1	1.20856	2.60638			n3	729
4	13.875	3	371	4	-1	1	1.14223	2.56937			n3-n	720
5	5.5385	5	150	5	0	0	0.743392	2.17609
6	3.052	7	123	6	1	1	0.484585	2.08991
7	5.0705	6	116	7	-1	1	0.705051	2.06446			Spearman's	0.925
8	0.701	9	28	8	1	1	-0.154282	1.44716			df	7
9	1.115	8	27	9	-1	1	0.0472749	1.43136			ρ	0
											ST	0.143614
											T	6.44087
											p	0.000353306
Mean	10.2919		293								ST	0.0595583
SD	9.87279		282.503								T	16.5805
Median	5.5385		150								Pearson's	0.987507
											p	7.08942e-07
Accesses:
Sample	Accesses	Acc rank	Citations	Cit rank	d	d2	lg(Accesses)	lg(Citations)
1	15511	2	966	1	1	1	4.19064	2.98498			∑d2	2
2	17055	1	452	2	-1	1	4.23185	2.65514			n	6
3	13073	3	371	3	0	0	4.11638	2.56937			n3	216
4	10057	4	123	4	0	0	4.00247	2.08991			n3-n	210
5	3810	5	28	5	0	0	3.58092	1.44716
6	142	6	27	6	0	0	2.15229	1.43136
											Spearman's	0.942857
											df	4
											ρ	0
											ST	0.166599
											T	5.65945
											p	0.00480466
Mean	9941.33		327.833								ST	0.314772
SD	6124.63		328.353								T	2.46834
Median	11565		247								Pearson's	0.776964
											p	0.0690699
Lg Citations vs lg IF
Regression Statistics
Multiple R	0.986937
R Square	0.974044
Adjusted R Square	0.970336
Standard Error	0.0925083
Observations	9
ANOVA
	df	SS	MS	F	Significance F
Regression	1	2.24804	2.24804	262.689	8.28295e-07
Residual	7	0.0599045	0.00855779
Total	8	2.30794
	Coefficients	Standard Error	t Stat	P-value	Lower 95%	Upper 95%	Lower 95.0%	Upper 95.0%
Intercept	1.50415	0.0541189	27.7934	2.00442e-08	1.37618	1.63212	1.37618	1.63212
lg(IF)	0.949172	0.0585631	16.2077	8.28295e-07	0.810692	1.08765	0.810692	1.08765
Lg Citations vs lg Downloads
Regression Statistics
Multiple R	0.776964
R Square	0.603674
Adjusted R Square	0.504592
Standard Error	0.459329
Observations	6
ANOVA
	df	SS	MS	F	Significance F
Regression	1	1.28546	1.28546	6.09269	0.0690699
Residual	4	0.843933	0.210983
Total	5	2.12939
	Coefficients	Standard Error	t Stat	P-value	Lower 95%	Upper 95%	Lower 95.0%	Upper 95.0%
Intercept	-0.157685	0.971941	-0.162237	0.878985	-2.85623	2.54086	-2.85623	2.54086
lg(Accesses)	0.634088	0.256889	2.46834	0.0690699	-0.0791494	1.34733	-0.0791494	1.34733

## Sheet: PRISMA
Sample	IF	IF rank	Citations	Cit rank	d	d2	lg(IF)	lg(Citations)
1	13.8765	3	1712	2	1	1	1.14228	3.2335			∑d2	8
2	16.477	1	1651	3	-2	4	1.21688	3.21775			n	7
3	14.6265	2	2941	1	1	1	1.16514	3.4685			n3	343
4	4.012	4	962	4	0	0	0.603361	2.98318			n3-n	336
5	1.293	5	480	5	0	0	0.111599	2.68124
6	0.6885	6	3	7	-1	1	-0.162096	0.477121
7	0	7	62	6	1	1					Spearman's	0.857143
											df	5
											ρ	0
											ST	0.23035
											T	3.72104
											p	0.0136973
Mean	7.28193		1115.86								ST	0.246809
SD	6.81427		981.978								T	3.37882
Median	4.012		962								Pearson's	0.833922
											p	0.0196995
Accesses:
Sample	Accesses	Acc rank	Citations	Cit rank	d	d2	lg(Accesses)	lg(Citations)
1	49961	1	2941	1	0	0	4.69863	3.4685			∑d2	2
2	12780	2	962	2	0	0	4.10653	2.98318			n	4
3	8612	3	3	4	-1	1	3.9351	0.477121			n3	64
4	7644	4	480	3	1	1	3.88332	2.68124			n3-n	60
											Spearman's	0.8
											df	2
											ρ	0
											ST	0.424264
											T	1.88562
											p	0.2
Mean	19749.2		1096.5								ST	0.56306
SD	17549.2		1117.6								T	1.07434
Median	10696		721								Pearson's	0.604919
											p	0.395081
Lg Citations vs lg IF
Regression Statistics
Multiple R	0.833922
R Square	0.695427
Adjusted R Square	0.619283
Standard Error	0.684967
Observations	6
ANOVA
	df	SS	MS	F	Significance F
Regression	1	4.28508	4.28508	9.13312	0.0390823
Residual	4	1.87672	0.46918
Total	5	6.1618
	Coefficients	Standard Error	t Stat	P-value	Lower 95%	Upper 95%	Lower 95.0%	Upper 95.0%
Intercept	1.62118	0.447465	3.62303	0.0222971	0.378818	2.86354	0.378818	2.86354
lg(IF)	1.55358	0.514072	3.02211	0.0390823	0.126287	2.98087	0.126287	2.98087
Lg Citations vs lg Downloads
Regression Statistics
Multiple R	0.604919
R Square	0.365928
Adjusted R Square	0.0488914
Standard Error	1.29115
Observations	4
ANOVA
	df	SS	MS	F	Significance F
Regression	1	1.92416	1.92416	1.15421	0.395081
Residual	2	3.33415	1.66707
Total	3	5.25831
	Coefficients	Standard Error	t Stat	P-value	Lower 95%	Upper 95%	Lower 95.0%	Upper 95.0%
Intercept	-6.49232	8.30445	-0.781788	0.516196	-42.2235	29.2388	-42.2235	29.2388
lg(Accesses)	2.14029	1.99219	1.07434	0.395081	-6.43139	10.712	-6.43139	10.712

## Sheet: STREGA
Sample	IF	IF rank	Citations	Cit rank	d	d2	lg(IF)	lg(Citations)
1	14.6265	2	109	1	1	1	1.16514	2.03743			∑d2	46
2	4.578	4	83	2	2	4	0.660676	1.91908			n	8
3	4.624	3	23	7	-4	16	0.665018	1.36173			n3	512
4	16.477	1	56	4	-3	9	1.21688	1.74819			n3-n	504
5	4.012	5	44	5	0	0	0.603361	1.64345
6	3.2655	6	31	6	0	0	0.51395	1.49136
7	2.809	7	68	3	4	16	0.448552	1.83251			Spearman's	0.452381
8	0	8	14	8	0	0					df	6
											ρ	0
											ST	0.364086
											T	1.24251
											p	0.260405
Mean	6.299		53.5								ST	0.36905
SD	5.53395		30.1123								T	1.15856
Median	4.295		50								Pearson's	0.427568
											p	0.290659
Accesses:
Sample	Accesses	Acc rank	Citations	Cit rank	d	d2	lg(Accesses)	lg(Citations)
1	3232	1	109	1	0	0	3.50947	2.03743			∑d2	2
2	2208	3	83	2	1	1	3.344	1.91908			n	4
3	1977	4	23	4	0	0	3.29601	1.36173			n3	64
4	2233	2	44	3	-1	1	3.34889	1.64345			n3-n	60
											Spearman's	0.8
											df	2
											ρ	0
											ST	0.424264
											T	1.88562
											p	0.2
Mean	2412.5		64.75								ST	0.429811
SD	483.55		33.4094								T	1.84746
Median	2220.5		63.5								Pearson's	0.794056
											p	0.205944
Lg Citations vs lg Downloads
Regression Statistics
Multiple R	0.427568
R Square	0.182814
Adjusted R Square	0.019377
Standard Error	0.235845
Observations	7
ANOVA
	df	SS	MS	F	Significance F
Regression	1	0.0622177	0.0622177	1.11856	0.338626
Residual	5	0.278115	0.055623
Total	6	0.340333
	Coefficients	Standard Error	t Stat	P-value	Lower 95%	Upper 95%	Lower 95.0%	Upper 95.0%
Intercept	1.47097	0.250979	5.86095	0.00204986	0.825812	2.11613	0.825812	2.11613
lg(IF)	0.329365	0.311421	1.05762	0.338626	-0.471169	1.1299	-0.471169	1.1299
Lg Citations vs lg Downloads
Regression Statistics
Multiple R	0.794056
R Square	0.630526
Adjusted R Square	0.445788
Standard Error	0.22455
Observations	4
ANOVA
	df	SS	MS	F	Significance F
Regression	1	0.172097	0.172097	3.41309	0.205944
Residual	2	0.100845	0.0504225
Total	3	0.272942
	Coefficients	Standard Error	t Stat	P-value	Lower 95%	Upper 95%	Lower 95.0%	Upper 95.0%
Intercept	-6.94751	4.70398	-1.47694	0.277722	-27.1871	13.2921	-27.1871	13.2921
lg(Accesses)	2.57451	1.39354	1.84746	0.205944	-3.42143	8.57045	-3.42143	8.57045

## Sheet: CONSORT
Sample	IF	IF rank	Citations	Cit rank	d	d2	lg(IF)	lg(Citations)
1	14.093	3	917	1	2	4	1.149	2.96237			∑d2	30.5
2	16.225	1	647	2	-1	1	1.21018	2.8109			n	12
3	15.253	2	175	4	-2	4	1.18336	2.24304			n3	1728
4	6.035	4	336	3	1	1	0.780677	2.52634			n3-n	1716
5	4.271	6	163	5	1	1	0.63053	2.21219
6	4.392	5	45	8	-3	9	0.642662	1.65321
7	2.12	7	160	6	1	1	0.326336	2.20412			Spearman's	0.893357
8	1.3645	8	108	7	1	1	0.134974	2.03342			df	10
9	0.799	9	9	10	-1	1	-0.0974532	0.954243			ρ	0
10	0.55	10	4	11	-1	1	-0.259637	0.60206			ST	0.142096
11	0	11.5	2	12	-0.5	0.25					T	6.28698
12	0	11.5	31	9	2.5	6.25					p	9.05989e-05
Mean	5.42521		216.417								ST	0.162818
SD	5.93417		275.061								T	5.26516
Median	3.1955		134								Pearson's	0.857264
											p	0.000365343
Accesses:
Sample	Accesses	Acc rank	Citations	Cit rank	d	d2	lg(Accesses)	lg(Citations)
1	6775	2	175	2	0	0	3.83091	2.24304			∑d2	10
2	13027	1	336	1	0	0	4.11484	2.52634			n	6
3	4515	5	163	3	2	4	3.65466	2.21219			n3	216
4	6591	3	160	4	-1	1	3.81895	2.20412			n3-n	210
5	6555	4	9	6	-2	4	3.81657	0.954243
6	2582	6	108	5	1	1	3.41196	2.03342
											Spearman's	0.714286
											df	4
											ρ	0
											ST	0.349927
											T	2.04124
											p	0.110787
Mean	6674.17		158.5								ST	0.491005
SD	3209.3		97.2124								T	0.38458
Median	6573		161.5								Pearson's	0.188831
											p	0.72012
Lg Citations vs lg IF
Regression Statistics
Multiple R	0.857264
R Square	0.734902
Adjusted R Square	0.701764
Standard Error	0.413974
Observations	10
ANOVA
	df	SS	MS	F	Significance F
Regression	1	3.80066	3.80066	22.1775	0.00152305
Residual	8	1.371	0.171375
Total	9	5.17166
	Coefficients	Standard Error	t Stat	P-value	Lower 95%	Upper 95%	Lower 95.0%	Upper 95.0%
Intercept	1.32519	0.197275	6.71747	0.000149982	0.870273	1.78011	0.870273	1.78011
lg(IF)	1.21916	0.258884	4.7093	0.00152305	0.622175	1.81615	0.622175	1.81615
Lg Citations vs lg Downloads
Regression Statistics
Multiple R	0.188831
R Square	0.0356571
Adjusted R Square	-0.205429
Standard Error	0.603857
Observations	6
ANOVA
	df	SS	MS	F	Significance F
Regression	1	0.0539315	0.0539315	0.147902	0.72012
Residual	4	1.45857	0.364644
Total	5	1.51251
	Coefficients	Standard Error	t Stat	P-value	Lower 95%	Upper 95%	Lower 95.0%	Upper 95.0%
Intercept	0.337379	4.40524	0.0765858	0.942631	-11.8935	12.5683	-11.8935	12.5683
lg(Accesses)	0.448125	1.16523	0.38458	0.72012	-2.78707	3.68332	-2.78707	3.68332

## Sheet: REFLECT
Sample	IF	IF rank	Citations	Cit rank	d	d2	lg(IF)	lg(Citations)
1	2.2295	1	30	1	0	0	0.348207	1.47712			∑d2	2
2	2.0755	3	18	2	1	1	0.317123	1.25527			n	5
3	2.144	2	12	3	-1	1	0.331225	1.07918			n3	125
4	1.8145	4	5	4	0	0	0.258757	0.69897			n3-n	120
5	0.7115	5	3	5	0	0	-0.147825	0.477121
											Spearman's	0.9
											df	3
											ρ	0
											ST	0.251661
											T	3.57624
											p	0.0373861
Mean	1.795		13.6								ST	0.339724
SD	0.559218		9.76934								T	2.38004
Median	2.0755		12								Pearson's	0.808556
											p	0.0976147
Accesses:
Sample	Accesses	Acc rank	Citations	Cit rank	d	d2	lg(Accesses)	lg(Citations)
1	1522	2	30	1	1	1	3.18241	1.47712			∑d2	2
2	3394	1	18	2	-1	1	3.53071	1.25527			n	3
3	856	3	12	3	0	0	2.93247	1.07918			n3	27
											n3-n	24
											Spearman's	0.5
											df	1
											ρ	0
											ST	0.866025
											T	0.57735
											p	0.666667
Mean	1924		20								ST	0.934953
SD	1074.42		7.48331								T	0.379455
Median	1522		18								Pearson's	0.354772
											p	0.769117
Lg Citations vs lg IF
Regression Statistics
Multiple R	0.808556
R Square	0.653762
Adjusted R Square	0.53835
Standard Error	0.276634
Observations	5
ANOVA
	df	SS	MS	F	Significance F
Regression	1	0.43349	0.43349	5.66457	0.0976147
Residual	3	0.229579	0.0765265
Total	4	0.663069
	Coefficients	Standard Error	t Stat	P-value	Lower 95%	Upper 95%	Lower 95.0%	Upper 95.0%
Intercept	0.648951	0.191719	3.38491	0.0429356	0.0388161	1.25909	0.0388161	1.25909
lg(IF)	1.57375	0.661231	2.38004	0.0976147	-0.530579	3.67809	-0.530579	3.67809
Lg Citations vs lg Downloads
Regression Statistics
Multiple R	0.354772
R Square	0.125863
Adjusted R Square	-0.748273
Standard Error	0.263662
Observations	3
ANOVA
	df	SS	MS	F	Significance F
Regression	1	0.0100095	0.0100095	0.143986	0.769117
Residual	1	0.0695175	0.0695175
Total	2	0.0795271
	Coefficients	Standard Error	t Stat	P-value	Lower 95%	Upper 95%	Lower 95.0%	Upper 95.0%
Intercept	0.513504	2.00082	0.256646	0.840066	-24.9094	25.9364	-24.9094	25.9364
lg(Accesses)	0.235451	0.620498	0.379455	0.769117	-7.64872	8.11963	-7.64872	8.11963

## Sheet: GRIPS
Sample	IF	IF rank	Citations	Cit rank	d	d2	lg(IF)	lg(Citations)
1	15.435	2	25	1	1	1	1.18851	1.39794			∑d2	105
2	2.926	9	16	2	7	49	0.466274	1.20412			n	11
3	15.2355	3	10	3.5	-0.5	0.25	1.18286	1			n3	1331
4	16.4165	1	10	3.5	-2.5	6.25	1.21528	1			n3-n	1320
5	4.9155	6	9	5	1	1	0.691568	0.954243
6	5.42	5	5	6	-1	1	0.733999	0.69897
7	4.8015	7	4	7	0	0	0.681377	0.60206			Spearman's	0.522727
8	4.3495	8	2	8	0	0	0.638439	0.30103			df	9
9	0	11	1	9	2	4					ρ	0
10	5.721	4	0	10.5	-6.5	42.25					ST	0.284167
11	1.8975	10	0	10.5	-0.5	0.25					T	1.83951
											p	0.0989888
Mean	7.01073		7.45455								ST	0.300605
SD	5.55641		7.36532								T	1.43751
Median	4.9155		5								Pearson's	0.432123
											p	0.184416
Accesses:
Sample	Accesses	Acc rank	Citations	Cit rank	d	d2	lg(Accesses)	lg(Citations)
1	1331	3	25	1	2	4	3.12418	1.39794			∑d2	34
2	1350	2	16	2	0	0	3.13033	1.20412			n	6
3	159	6	9	3	3	9	2.2014	0.954243			n3	216
4	473	5	4	4	1	1	2.67486	0.60206			n3-n	210
5	1823	1	2	5	-4	16	3.26079	0.30103
6	1027	4	0	6	-2	4
											Spearman's	0.0285714
											df	4
											ρ	0
											ST	0.499796
											T	0.0571662
											p	0.957155
Mean	1027.17		9.33333								ST	0.499985
SD	561.353		8.7496								T	-0.0156921
Median	1179		6.5								Pearson's	-0.00784579
											p	#NUM!
Lg Citations vs lg IF
Regression Statistics
Multiple R	0.432123
R Square	0.18673
Adjusted R Square	0.0511854
Standard Error	0.339651
Observations	8
ANOVA
	df	SS	MS	F	Significance F
Regression	1	0.158927	0.158927	1.37763	0.284982
Residual	6	0.692178	0.115363
Total	7	0.851105
	Coefficients	Standard Error	t Stat	P-value	Lower 95%	Upper 95%	Lower 95.0%	Upper 95.0%
Intercept	0.463788	0.38635	1.20044	0.275209	-0.481575	1.40915	-0.481575	1.40915
lg(IF)	0.507194	0.432124	1.17372	0.284982	-0.550175	1.56456	-0.550175	1.56456
Lg Citations vs lg Downloads
Regression Statistics
Multiple R	0.00784579
R Square	6.15564e-05
Adjusted R Square	-0.333251
Standard Error	0.513332
Observations	5
ANOVA
	df	SS	MS	F	Significance F
Regression	1	4.86652e-05	4.86652e-05	0.000184681	0.990011
Residual	3	0.79053	0.26351
Total	4	0.790579
	Coefficients	Standard Error	t Stat	P-value	Lower 95%	Upper 95%	Lower 95.0%	Upper 95.0%
Intercept	0.914763	1.69953	0.538244	0.627779	-4.49391	6.32344	-4.49391	6.32344
lg(Accesses)	-0.00795067	0.58505	-0.0135897	0.990011	-1.86984	1.85394	-1.86984	1.85394

## Sheet: CARE
Sample	IF	IF rank	Citations	Cit rank	d	d2	lg(IF)	lg(Citations)
1	3.063	3	3	5	-2	4	0.486147	0.477121			∑d2	22
2	4.575	2	6	3	-1	1	0.660391	0.778151			n	7
3	5.405	1	20	1	0	0	0.732796	1.30103			n3	343
4	0	5.5	12	2	3.5	12.25					n3-n	336
5	0	5.5	1	6	-0.5	0.25
6	0	5.5	5	4	1.5	2.25
7	0	5.5	0	7	-1.5	2.25					Spearman's	0.607143
											df	5
											ρ	0
											ST	0.355353
											T	1.70856
											p	0.148231
Mean	1.86329		6.71429								ST	0.169298
SD	2.24321		6.5403								T	5.46715
Median	0		5								Pearson's	0.925576
											p	0.00278736
Accesses:
Sample	Accesses	Acc rank	Citations	Cit rank	d	d2	lg(Accesses)	lg(Citations)
1	137	5	5	4	1	1	2.13672	0.69897			∑d2	8
2	1951	2	6	3	-1	1	3.29026	0.778151			n	5
3	1326	3	20	1	2	4	3.12254	1.30103			n3	125
4	14886	1	12	2	-1	1	4.17278	1.07918			n3-n	120
5	379	4	3	5	-1	1	2.57864	0.477121
											Spearman's	0.6
											df	3
											ρ	0
											ST	0.46188
											T	1.29904
											p	0.284757
Mean	3735.8		9.2								ST	0.46836
SD	5613.18		6.17738								T	1.24848
Median	1326		6								Pearson's	0.584737
											p	0.300414
Lg Citations vs lg IF
Regression Statistics
Multiple R	0.925576
R Square	0.856691
Adjusted R Square	0.713383
Standard Error	0.223196
Observations	3
ANOVA
	df	SS	MS	F	Significance F
Regression	1	0.297799	0.297799	5.97795	0.247162
Residual	1	0.0498163	0.0498163
Total	2	0.347616
	Coefficients	Standard Error	t Stat	P-value	Lower 95%	Upper 95%	Lower 95.0%	Upper 95.0%
Intercept	-1.05458	0.79041	-1.33422	0.409462	-11.0977	8.98853	-11.0977	8.98853
lg(IF)	3.04366	1.24486	2.44498	0.247162	-12.7738	18.8611	-12.7738	18.8611
Lg Citations vs lg Downloads
Regression Statistics
Multiple R	0.584737
R Square	0.341917
Adjusted R Square	0.122556
Standard Error	0.304087
Observations	5
ANOVA
	df	SS	MS	F	Significance F
Regression	1	0.144131	0.144131	1.5587	0.300414
Residual	3	0.277406	0.0924686
Total	4	0.421536
	Coefficients	Standard Error	t Stat	P-value	Lower 95%	Upper 95%	Lower 95.0%	Upper 95.0%
Intercept	0.113715	0.618413	0.183882	0.865833	-1.85435	2.08178	-1.85435	2.08178
lg(Accesses)	0.246121	0.197137	1.24848	0.300414	-0.381256	0.873497	-0.381256	0.873497

## Sheet: CHEERS
Sample	IF	IF rank	Citations	Cit rank	d	d2	lg(IF)	lg(Citations)
1	16.7965	1	42	1	0	0	1.22522	1.62325			∑d2	111
2	6.9795	2	16	4.5	-2.5	6.25	0.843824	1.20412			n	10
3	3.811	3	5	9	-6	36	0.581039	0.69897			n3	1000
4	3.0995	4	18	2	2	4	0.491292	1.25527			n3-n	990
5	2.541	5	16	4.5	0.5	0.25	0.405005	1.20412
6	2.408	6	4	10	-4	16	0.381656	0.60206
7	2.004	7	8	7	0	0	0.301898	0.90309			Spearman's	0.327273
8	1.5535	8	12	6	2	4	0.191311	1.07918			df	8
9	0	9.5	17	3	6.5	42.25					ρ	0
10	0	9.5	7	8	1.5	2.25					ST	0.334083
											T	0.979615
											p	0.355968
Mean	3.9193		14.5								ST	0.274302
SD	4.69086		10.4139								T	2.30011
Median	2.4745		14								Pearson's	0.630926
											p	0.050462
Accesses:
Sample	Accesses	Acc rank	Citations	Cit rank	d	d2	lg(Accesses)	lg(Citations)
1	2572	3	42	1	2	4	3.41027	1.62325			∑d2	46.5
2	6091	1	16	4.5	-3.5	12.25	3.78469	1.20412			n	9
3	951	5	5	8	-3	9	2.97818	0.69897			n3	729
4	814	6	18	2	4	16	2.91062	1.25527			n3-n	720
5	2039	4	16	4.5	-0.5	0.25	3.30942	1.20412
6	303	9	4	9	0	0	2.48144	0.60206
7	718	7	8	7	0	0	2.85612	0.90309			Spearman's	0.6125
8	448	8	12	6	2	4	2.65128	1.07918			df	7
9	5189	2	17	3	-1	1	3.71508	1.23045			ρ	0
											ST	0.29877
											T	2.05007
											p	0.0795218
Mean	2125		15.3333								ST	0.293386
SD	2014.75		10.6562								T	2.1489
Median	951		16								Pearson's	0.630456
											p	0.0687254
Lg Citations vs lg IF
Regression Statistics
Multiple R	0.630926
R Square	0.398067
Adjusted R Square	0.297745
Standard Error	0.276297
Observations	8
ANOVA
	df	SS	MS	F	Significance F
Regression	1	0.302909	0.302909	3.96789	0.0934624
Residual	6	0.45804	0.07634
Total	7	0.760949
	Coefficients	Standard Error	t Stat	P-value	Lower 95%	Upper 95%	Lower 95.0%	Upper 95.0%
Intercept	0.728215	0.19799	3.67803	0.0103549	0.24375	1.21268	0.24375	1.21268
lg(IF)	0.620718	0.311612	1.99196	0.0934624	-0.14177	1.38321	-0.14177	1.38321
Lg Citations vs lg Downloads
Regression Statistics
Multiple R	0.630456
R Square	0.397474
Adjusted R Square	0.311399
Standard Error	0.259688
Observations	9
ANOVA
	df	SS	MS	F	Significance F
Regression	1	0.311411	0.311411	4.61776	0.0687254
Residual	7	0.472064	0.0674377
Total	8	0.783475
	Coefficients	Standard Error	t Stat	P-value	Lower 95%	Upper 95%	Lower 95.0%	Upper 95.0%
Intercept	-0.256325	0.631985	-0.405587	0.697156	-1.75073	1.23808	-1.75073	1.23808
lg(Accesses)	0.430914	0.200528	2.1489	0.0687254	-0.0432593	0.905087	-0.0432593	0.905087
