# Supplementary material for: Auto-correlation of journal impact factor for consensus research reporting statements: a cohort study
Source: PeerJ. 2016 Mar 31;4:e1887. doi: 10.7717/peerj.1887 (PMC4824875; doi:10.7717/peerj.1887)
Supplement: Supplemental Information 2 [file peerj-04-1887-s002.xlsx]

## Sheet: Summary
	STARD	STROBE	PRISMA	STREGA	CONSORT	REFLECT	GRIPS	CARE	CHEERS		Median	Min	Max	Lower 95%CI	Upper 95%CI]
R2		0.99566	0.70869	0.180693	0.214931				0.256727		0.256727	0.180693	0.99566
p value	#NUM!	0.000132861	0.311614	0.522592	0.323287	#NUM!	0.796053	#NUM!	0.205376
IF coefficient	-0.352388	0.843991	4.45076	-1.08036	0.907472	14.1804	0.746738	5.23331	0.355039		0.843991	-1.08036	14.1804	-0.352388	5.23331
Lower 95%CI	-0.352388	0.717883	-19.598	-24.1888	-0.72185	14.1804	-3.74246	5.23331	-0.818172
Upper 95%CI	-0.352388	0.970099	28.4995	22.0281	2.53679	14.1804	5.23593	5.23331	1.52825
p value	#NUM!	0.000226447	0.255973	0.658757	0.174427	#NUM!	0.54845	#NUM!	0.471807
Downloads coefficient	1.35254	0.141416	-4.30147	5.45277	-0.288226	0.62862	-0.0536894	-0.858386	0.292395		0.141416	-4.30147	5.45277	-0.858386	1.35254
Lower 95%CI	1.35254	0.0352379	-41.8216	-59.7677	-3.5599	0.62862	-2.8182	-0.858386	-0.626624
Upper 95%CI	1.35254	0.247593	33.2187	70.6732	2.98345	0.62862	2.71082	-0.858386	1.21141
p value	#NUM!	0.0240415	0.38299	0.480773	0.797419	#NUM!	0.941016	#NUM!	0.45064
IF > Downloads?	0	1	1	0	1	1	1	1	1

## Sheet: STARD
Citations	IF	Downloads		lg Citations	lg IF	lg Downloads
781	11.275	12203		2.89265	1.05212	4.08647
510	15.148			1.39794	0.31334	2.78888
543	6.382			1.85126	0.218536	3.09934
227	5.6435
35	2.7765
39	1.887
25	2.0575	615
105	1.5365
71	1.654	1257
41	1.144
39	2.609
27	1.8525
26	1.8475
3	0
8	0
SUMMARY OUTPUT
Regression Statistics
Multiple R	1
R Square	1
Adjusted R Square	65535
Standard Error	0
Observations	3
ANOVA
	df	SS	MS	F	Significance F
Regression	2	1.17472	0.58736	#NUM!	#NUM!
Residual	0	0	65535
Total	2	1.17472
	Coefficients	Standard Error	t Stat	P-value	Lower 95%	Upper 95%	Lower 95.0%	Upper 95.0%
Intercept	-2.26371	0	65535	#NUM!	-2.26371	-2.26371	-2.26371	-2.26371
lg IF	-0.352388	0	65535	#NUM!	-0.352388	-0.352388	-0.352388	-0.352388
lg Downloads	1.35254	0	65535	#NUM!	1.35254	1.35254	1.35254	1.35254
RESIDUAL OUTPUT
Observation	Predicted lg Citations	Residuals
1	2.89265	0
2	1.39794	-2.22045e-16
3	1.85126	-2.22045e-16

## Sheet: STROBE
Citations	IF	Downloads		lg Citations	lg IF	lg Downloads
966	33.5455	15511		2.98498	1.52563	4.19064
452	13.5655	17055		2.65514	1.13244	4.23185
404	16.1645			2.56937	1.14223	4.11638
371	13.875	13073		2.08991	0.484585	4.00247
150	5.5385			1.44716	-0.154282	3.58092
123	3.052	10057		1.43136	0.0472749	2.15229
116	5.0705
28	0.701	3810
27	1.115	142
SUMMARY OUTPUT
Regression Statistics
Multiple R	0.998697
R Square	0.997396
Adjusted R Square	0.99566
Standard Error	0.0429899
Observations	6
ANOVA
	df	SS	MS	F	Significance F
Regression	2	2.12385	1.06192	574.592	0.000132861
Residual	3	0.0055444	0.00184813
Total	5	2.12939
	Coefficients	Standard Error	t Stat	P-value	Lower 95%	Upper 95%	Lower 95.0%	Upper 95.0%
Intercept	1.08364	0.108035	10.0304	0.00210953	0.739826	1.42746	0.739826	1.42746
lg IF	0.843991	0.0396261	21.2989	0.000226447	0.717883	0.970099	0.717883	0.970099
lg Downloads	0.141416	0.0333635	4.23863	0.0240415	0.0352379	0.247593	0.0352379	0.247593
RESIDUAL OUTPUT
Observation	Predicted lg Citations	Residuals
1	2.96389	0.0210915
2	2.63786	0.0172807
3	2.6298	-0.0604224
4	2.05864	0.0312663
5	1.45983	-0.0126705
6	1.42791	0.00345445

## Sheet: PRISMA
Citations	IF	Downloads		lg Citations	lg IF	lg Downloads
1712	13.8765			3.4685	1.16514	4.69863
1651	16.477			2.98318	0.603361	4.10653
2941	14.6265	49961		0.477121	-0.162096	3.9351
962	4.012	12780		2.68124	0.111599	3.88332
62	0
3	0.6885	8612
480	1.293	7644
SUMMARY OUTPUT
Regression Statistics
Multiple R	0.950209
R Square	0.902897
Adjusted R Square	0.70869
Standard Error	0.714563
Observations	4
ANOVA
	df	SS	MS	F	Significance F
Regression	2	4.74771	2.37385	4.64915	0.311614
Residual	1	0.5106	0.5106
Total	3	5.25831
	Coefficients	Standard Error	t Stat	P-value	Lower 95%	Upper 95%	Lower 95.0%	Upper 95.0%
Intercept	18.3674	11.5274	1.59337	0.356804	-128.102	164.836	-128.102	164.836
lg IF	4.45076	1.89268	2.35157	0.255973	-19.598	28.4995	-19.598	28.4995
lg Downloads	-4.30147	2.9529	-1.45669	0.38299	-41.8216	33.2187	-41.8216	33.2187
RESIDUAL OUTPUT
Observation	Predicted lg Citations	Residuals
1	3.34211	0.126386
2	3.38866	-0.405488
3	0.719183	-0.242062
4	2.16008	0.521164

## Sheet: STREGA
Citations	IF	Downloads		lg Citations	lg IF	lg Downloads
109	14.6265	3232		2.03743	1.16514	3.50947
83	4.578	2208		1.91908	0.660676	3.344
23	4.624	1977		1.36173	0.665018	3.29601
56	16.477			1.64345	0.603361	3.34889
44	4.012	2233
31	3.2655
68	2.809
14	0
SUMMARY OUTPUT
Regression Statistics
Multiple R	0.852583
R Square	0.726898
Adjusted R Square	0.180693
Standard Error	0.273022
Observations	4
ANOVA
	df	SS	MS	F	Significance F
Regression	2	0.198401	0.0992005	1.33082	0.522592
Residual	1	0.0745411	0.0745411
Total	3	0.272942
	Coefficients	Standard Error	t Stat	P-value	Lower 95%	Upper 95%	Lower 95.0%	Upper 95.0%
Intercept	-15.8247	16.001	-0.988985	0.503526	-219.137	187.487	-219.137	187.487
lg IF	-1.08036	1.81868	-0.594037	0.658757	-24.1888	22.0281	-24.1888	22.0281
lg Downloads	5.45277	5.13296	1.0623	0.480773	-59.7677	70.6732	-59.7677	70.6732
RESIDUAL OUTPUT
Observation	Predicted lg Citations	Residuals
1	2.05283	-0.0154031
2	1.69555	0.223526
3	1.42917	-0.0674414
4	1.78413	-0.140682

## Sheet: CONSORT
Citations	IF	Downloads		lg Citations	lg IF	lg Downloads
917	14.093			2.24304	1.18336	3.83091
647	16.225			2.52634	0.780677	4.11484
175	15.253	6775		2.21219	0.63053	3.65466
336	6.035	13027		2.20412	0.326336	3.81895
163	4.271	4515		0.954243	-0.0974532	3.81657
45	4.392			2.03342	0.134974	3.41196
160	2.12	6591
31	0
9	0.799	6555
4	0.55
2	0
108	1.3645	2582
SUMMARY OUTPUT
Regression Statistics
Multiple R	0.727295
R Square	0.528959
Adjusted R Square	0.214931
Standard Error	0.487324
Observations	6
ANOVA
	df	SS	MS	F	Significance F
Regression	2	0.800053	0.400027	1.68443	0.323287
Residual	3	0.712453	0.237484
Total	5	1.51251
	Coefficients	Standard Error	t Stat	P-value	Lower 95%	Upper 95%	Lower 95.0%	Upper 95.0%
Intercept	2.6694	3.79075	0.704188	0.532056	-9.39445	14.7332	-9.39445	14.7332
lg IF	0.907472	0.511972	1.7725	0.174427	-0.72185	2.53679	-0.72185	2.53679
lg Downloads	-0.288226	1.02804	-0.280365	0.797419	-3.5599	2.98345	-3.5599	2.98345
RESIDUAL OUTPUT
Observation	Predicted lg Citations	Residuals
1	2.63909	-0.396053
2	2.19183	0.334505
3	2.18822	0.0239702
4	1.86482	0.339304
5	1.48093	-0.526683
6	1.80847	0.224957

## Sheet: REFLECT
Citations	IF	Downloads		lg Citations	lg IF	lg Downloads
30	2.2295	1522		1.47712	0.348207	3.18241
18	2.0755	3394		1.25527	0.317123	3.53071
12	2.144	856		1.07918	0.331225	2.93247
5	1.8145
3	0.7115
SUMMARY OUTPUT
Regression Statistics
Multiple R	1
R Square	1
Adjusted R Square	65535
Standard Error	0
Observations	3
ANOVA
	df	SS	MS	F	Significance F
Regression	2	0.0795271	0.0397635	#NUM!	#NUM!
Residual	0	0	65535
Total	2	0.0795271
	Coefficients	Standard Error	t Stat	P-value	Lower 95%	Upper 95%	Lower 95.0%	Upper 95.0%
Intercept	-5.46114	0	65535	#NUM!	-5.46114	-5.46114	-5.46114	-5.46114
lg IF	14.1804	0	65535	#NUM!	14.1804	14.1804	14.1804	14.1804
lg Downloads	0.62862	0	65535	#NUM!	0.62862	0.62862	0.62862	0.62862
RESIDUAL OUTPUT
Observation	Predicted lg Citations	Residuals
1	1.47712	6.66134e-16
2	1.25527	4.44089e-16
3	1.07918	1.11022e-15

## Sheet: GRIPS
Citations	IF	Downloads		lg Citations	lg IF	lg Downloads
25	15.435	1331		1.39794	1.18851	3.12418
16	2.926	1350		1.20412	0.466274	3.13033
10	15.2355			0.954243	0.691568	2.2014
10	16.4165			0.60206	0.681377	2.67486
9	4.9155	159		0.30103	0.638439	3.26079
5	5.42
4	4.8015	473
2	4.3495	1823
1	0
0	5.721
0	1.8975	1027
SUMMARY OUTPUT
Regression Statistics
Multiple R	0.451604
R Square	0.203947
Adjusted R Square	-0.592107
Standard Error	0.560956
Observations	5
ANOVA
	df	SS	MS	F	Significance F
Regression	2	0.161236	0.0806179	0.256197	0.796053
Residual	2	0.629343	0.314672
Total	4	0.790579
	Coefficients	Standard Error	t Stat	P-value	Lower 95%	Upper 95%	Lower 95.0%	Upper 95.0%
Intercept	0.49888	1.94599	0.256363	0.821631	-7.87402	8.87178	-7.87402	8.87178
lg IF	0.746738	1.04335	0.715709	0.54845	-3.74246	5.23593	-3.74246	5.23593
lg Downloads	-0.0536894	0.642514	-0.0835614	0.941016	-2.8182	2.71082	-2.8182	2.71082
RESIDUAL OUTPUT
Observation	Predicted lg Citations	Residuals
1	1.21865	0.179292
2	0.678999	0.525121
3	0.897109	0.057134
4	0.864079	-0.262019
5	0.800558	-0.499528

## Sheet: CARE
Citations	IF	Downloads		lg Citations	lg IF	lg Downloads
5	0	137		0.778151	0.660391	3.29026
6	4.575	1951		1.30103	0.732796	3.12254
20	5.405	1326		0.477121	0.486147	2.57864
12	0	14886
1	0
3	3.063	379
0	0
SUMMARY OUTPUT
Regression Statistics
Multiple R	1
R Square	1
Adjusted R Square	65535
Standard Error	0
Observations	3
ANOVA
	df	SS	MS	F	Significance F
Regression	2	0.347616	0.173808	#NUM!	#NUM!
Residual	0	0	65535
Total	2	0.347616
	Coefficients	Standard Error	t Stat	P-value	Lower 95%	Upper 95%	Lower 95.0%	Upper 95.0%
Intercept	0.146432	0	65535	#NUM!	0.146432	0.146432	0.146432	0.146432
lg IF	5.23331	0	65535	#NUM!	5.23331	5.23331	5.23331	5.23331
lg Downloads	-0.858386	0	65535	#NUM!	-0.858386	-0.858386	-0.858386	-0.858386
RESIDUAL OUTPUT
Observation	Predicted lg Citations	Residuals
1	0.778151	2.22045e-16
2	1.30103	4.44089e-16
3	0.477121	-1.66533e-16

## Sheet: CHEERS
Citations	IF	Downloads		lg Citations	lg IF	lg Downloads
42	16.7965	2572		1.62325	1.22522	3.41027
16	6.9795	6091		1.20412	0.843824	3.78469
5	3.811	951		0.69897	0.581039	2.97818
18	3.0995	814		1.25527	0.491292	2.91062
16	2.541	2039		1.20412	0.405005	3.30942
4	2.408	303		0.60206	0.381656	2.48144
8	2.004	718		0.90309	0.301898	2.85612
12	1.5535	448		1.07918	0.191311	2.65128
17	0	5189
7	0
SUMMARY OUTPUT
Regression Statistics
Multiple R	0.684902
R Square	0.469091
Adjusted R Square	0.256727
Standard Error	0.284252
Observations	8
ANOVA
	df	SS	MS	F	Significance F
Regression	2	0.356954	0.178477	2.2089	0.205376
Residual	5	0.403995	0.0807989
Total	7	0.760949
	Coefficients	Standard Error	t Stat	P-value	Lower 95%	Upper 95%	Lower 95.0%	Upper 95.0%
Intercept	-0.0161045	0.932602	-0.0172683	0.98689	-2.41343	2.38122	-2.41343	2.38122
lg IF	0.355039	0.456399	0.777913	0.471807	-0.818172	1.52825	-0.818172	1.52825
lg Downloads	0.292395	0.357514	0.817856	0.45064	-0.626624	1.21141	-0.626624	1.21141
RESIDUAL OUTPUT
Observation	Predicted lg Citations	Residuals
1	1.41604	0.207207
2	1.39011	-0.18599
3	1.06099	-0.362022
4	1.00938	0.245897
5	1.09535	0.108775
6	0.84496	-0.2429
7	0.926198	-0.0231078
8	0.827039	0.252142
