# Supplementary material for: Auto-correlation of journal impact factor for consensus research reporting statements: a cohort study
Source: PeerJ. 2016 Mar 31;4:e1887. doi: 10.7717/peerj.1887 (PMC4824875; doi:10.7717/peerj.1887)
Supplement: Supplemental Information 3 — A JIF of zero was allocated for journals not in the JCR, to represent their position at the bottom of the ISI category. [file peerj-04-1887-s003.xlsx]

## Sheet: Journal IFs
Journal	Publisher	2013	2012	2011	2010	2009	2008	2007	2006	2005	2004	2003	2002
Academic Radiology	Elsevier	2.077	1.914	1.692	2.195	2.092	2.021	2.094	1.781	1.644	1.47	1.409	1.459
Ann Clin Biochem	Sage	2.08	1.922	2.17	2.209	1.917	1.788	1.928	1.741	1.25	1.303	1.242	1.119
Ann Int Med	Am Coll Phys	16.104	13.976	16.733	16.729	16.225	17.457	15.516	14.78	13.254	13.115	12.427	11.414
Am J Clin Pathol	ASCP	3.005	2.881	2.598	2.506	2.473	2.715	2.626	2.939	2.942	2.716	2.853	2.837
Am J Roentgenology	ARRS	2.744	2.897	2.775	2.797	2.951	2.94	2.47	2.117	2.209	2.384	2.474	2.424
BJOG	Wiley	3.862	3.76
BMC Medicine	Springer/BMC	7.28	6.679	6.035	5.75	3.985
BMJ	BMJ Group	16.378	17.215	14.093	13.471	13.66	12.827	9.723	9.245	9.052	7.038	7.209	7.585
BMJ Case Reports	BMJ Group	0	0
Bulletin of the World Health Organization	WHO	5.112	5.25	4.641	5.459	5.302	3.803	4.019	5.029
Circulation: Cardiovascular Genetics	Wolters Kluwer	5.337	6.728	6.105	4.043
Clin Biochem	Elsevier	2.229	2.45	2.076	2.043	2.019	1.926	2.072	2.331	2.359	1.731	1.825	1.724
Clin Chem	AACC	7.768	7.149	7.905	6.886	6.263	5.579	4.803	5.454	7.717	6.501	5.538	4.788
Clin Chem Lab Med	De Gruyter	2.955	3.009	2.15	2.069	1.886	1.888	1.741	1.725	1.918	1.685	1.523	1.407
Clin Radiology	Elsevier	1.663	1.818	1.952	1.765	1.645	1.622	1.429	1.665	1.799	1.514	1.27	1.048
Clin Therapeutics	Elsevier	2.586	2.23
Cost Effectiveness and Resource Allocation	Springer/BMC	0	0
Croatian Med J		1.373	1.25	1.796	1.455	1.373	1.114	1.174	0.825	0.798	0.69	0.943	0.71
Deutsches Arzteblatt International		3.608	5.542
Deutsche Medizinische Wochenschrift	Thieme	0.55	0.653	0.528	0.5	0.59
Epidemiology	Wolters Kluwer	6.178	5.738	5.566	5.866	5.511	5.406	5.283	4.339
Eur J Clin Invest	Wiley	2.834	3.365	3.018	2.736	2.643	2.784
Eur J Epidemiol	Springer	5.147	5.118	4.713	4.535	3.718	2.572
Eur J Health Econ	Springer	1.913	2.095
Eur J Human Genetics	NPG	4.225	4.319	4.4	4.38
Family Practice	OUP	1.842	1.828	1.503	1.709	1.515	1.63	1.696	1.558	1.167	1.296	1.023	1.061
Gaceta Sanitaria	Elsevier	1.25	1.116	1.326	1.114	1.172	0	0	0
Genetic Epidemiol	Wiley	2.951	4.015	3.441	3.988	3.09	2.203
Genetics in Medicine	NPG	6.435	5.56	4.762	5.28
Genome Medicine	Springer/BMC	4.942	3.795	0	0
Global Adv Health Med		0	0
Headache	Wiley	3.189	2.937
Human Genetics	Springer	4.522	4.633	5.069	5.047	4.523	4.042
Int J Surgery	Elsevier	1.65	1.436	1.293	0	0	0
Int J Technol Assess in Healthcare	CUP	1.556	1.551
It J Public Health	closed	0	0	0	0	0	0
J Chinese Integrative Med	Elsevier	1.401	1.059	0.799	0.578	0.42	0
J Clin Epi	Elsevier	5.478	5.332	4.271	3.753	2.956	2.896	2.565	2.44
J Diet Suppl	Informa	0	0
J Food Protection	ingentaconnect	1.797	1.832	1.937	1.72
J Med Case Reports	Springer/BMC	0	0
J Med Economics	Informa	0	0
J Vet Intern Med	Wiley	2.224	2.064	1.992	2.277
J Swine Health Production	American Association of Swine Veterinarians	0.771	0.625	0.69	0.733
Lancet	Elsevier	39.207	39.06	38.279	36.333	30.758	28.409	28.638	25.8
Nederlands Tichschrift de Gessunke		0	0	0	0	0	0	0	0	0	0	0	0
Obstet Gynecol	Wolters Kluwer	4.368	4.798	4.73	4.392	4.357
Open Medicine	closed	0	0	0	0	0
Pharmacoeconomics	Springer	3.338	2.861
PLoS Med	PLoS	14	15.253	16.269	15.617	13.05	12.185	12.601	13.75
Prev Med	Elsevier	2.932	3.496	3.216	3.299	3.172	2.757	2.314	2.39
Prev Vet Med	Elsevier	2.506	2.389	2.046	2.07
Radiology	RSNA	6.214	6.339	5.726	6.069	6.341	5.996	5.561	5.251	5.377	5.076	4.815	4.844
Revista Espanola de Salud Publica		0.6	0.696	0.706	0.774	0.747	0.806	0	0
Revista di Medicina di Laboratina	Giuffrè Editore	0	0	0	0	0	0	0	0	0	0	0	0
Trials	Springer/BMC	2.12	2.206	2.496	2.08	2.02
Val Health	Elsevier	2.891	2.191
Zoonoses Public Health	Wiley	2.065	2.086	1.895	2.22
